# Supplementary material
Source: PubMed Central journal article supplement (PMC5081094)

### Supplementary Figure 3.

Relationship between *PTEN* loss, *RB1* loss and *TP53* mutation status and time to metastasis.

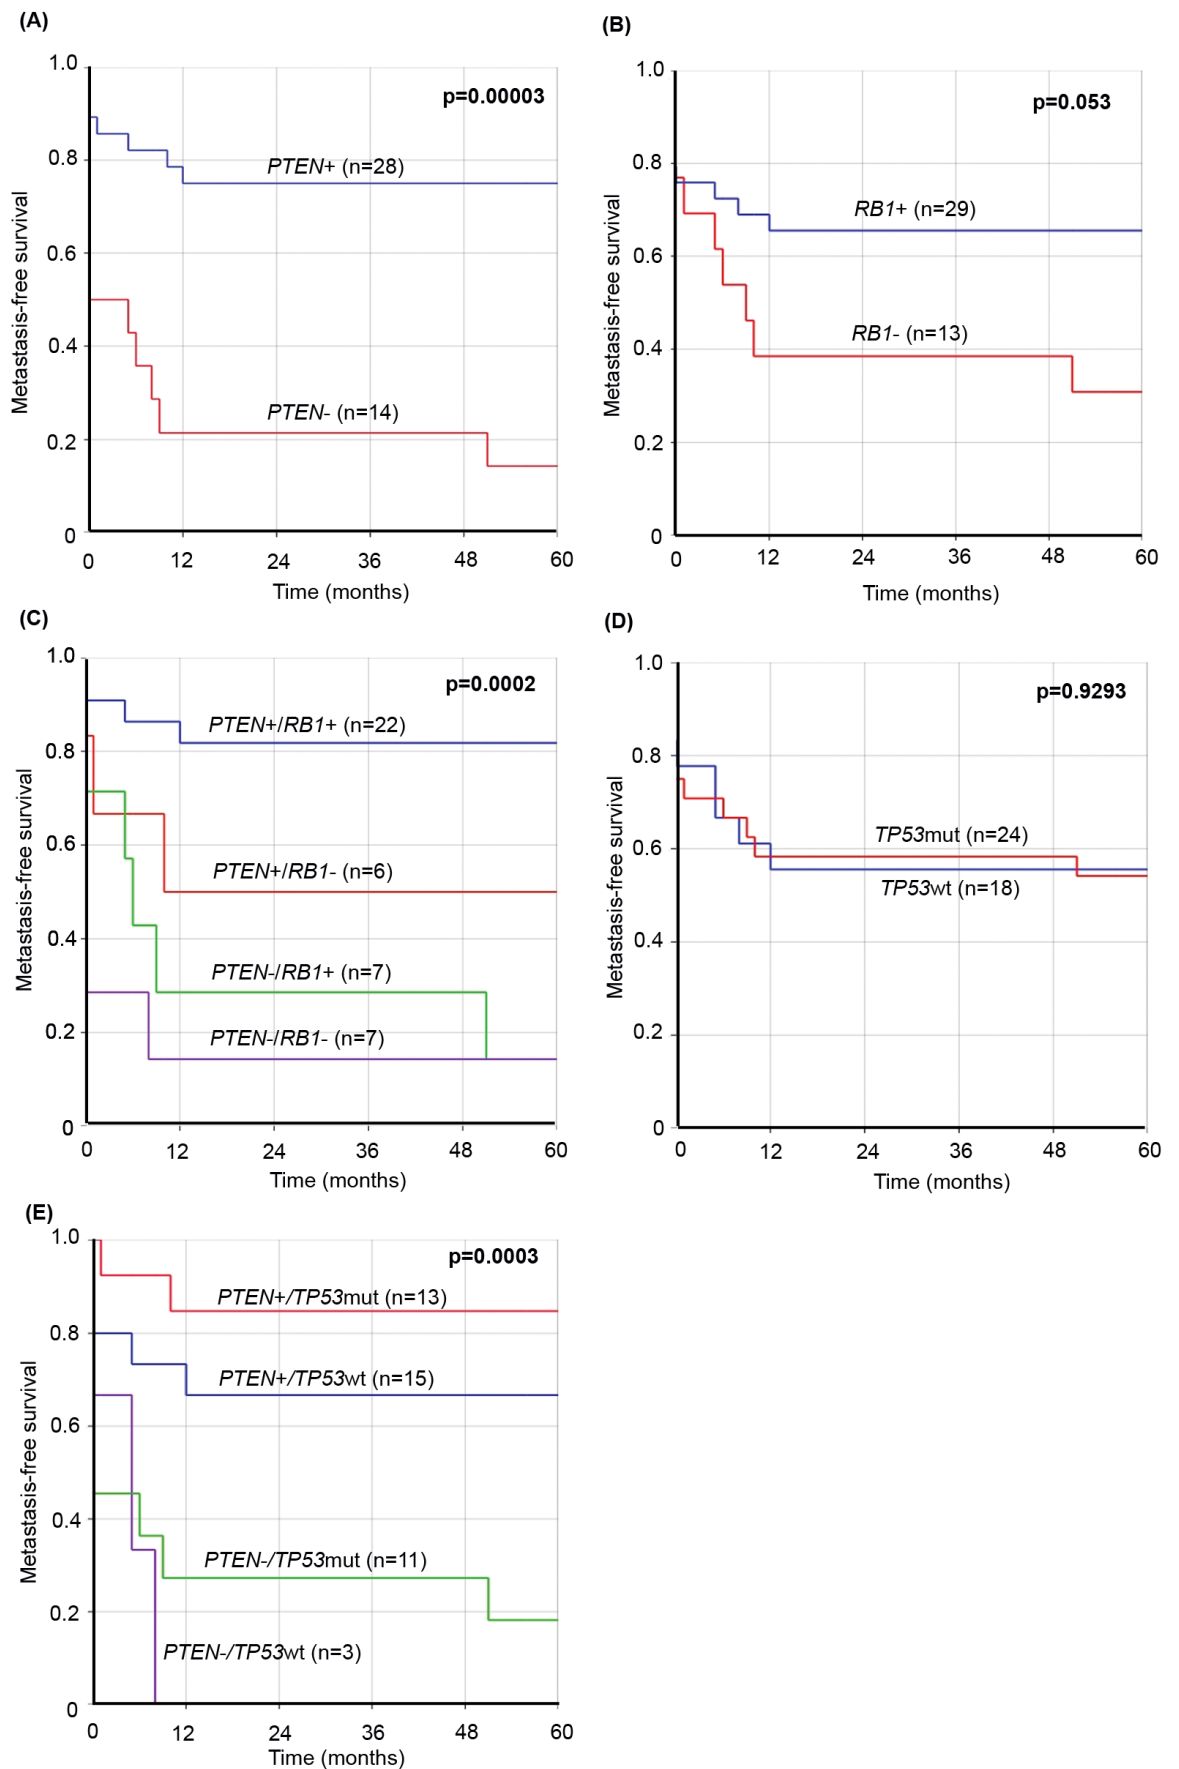

Supplement: NIHMS49834-supplement-Supplementary_Figure_3.pdf [file NIHMS49834-supplement-Supplementary_Figure_3.pdf]
