# Supplementary material
Source: PubMed Central journal article supplement (PMC5081094)

# Supplementary Figure 4.

Copy number (CN), mutation status (MS), loss of heterozygosity analysis (LOH) and immunohistochemistry (IHC) data for all tumors (n=160).

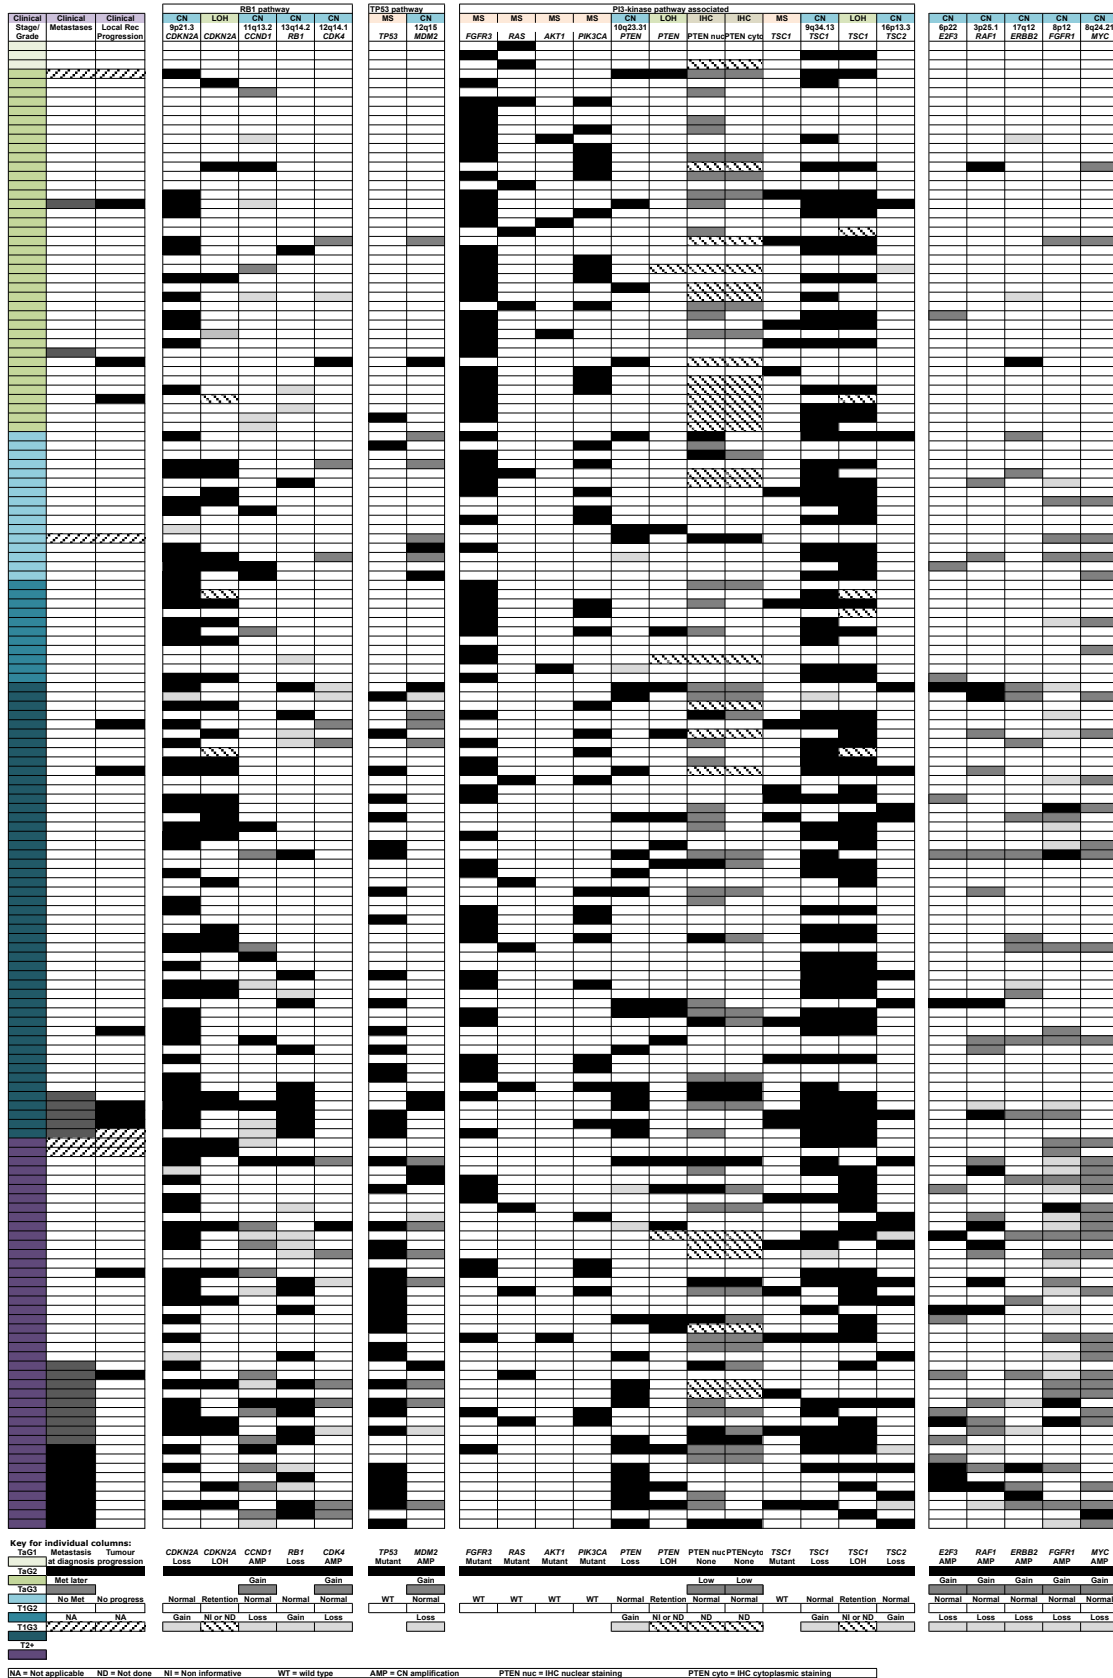

Supplement: NIHMS49834-supplement-Supplementary_Figure_4.pdf [file NIHMS49834-supplement-Supplementary_Figure_4.pdf]
