# Supplementary material
Source: PubMed Central journal article supplement (PMC5081094)

Supplementary Figure 5.

Unsupervised hierarchical cluster analysis of aCGH data from all tumor samples and genome-wide frequency plots of copy number alterations in individual  $\geq T2$  clusters.

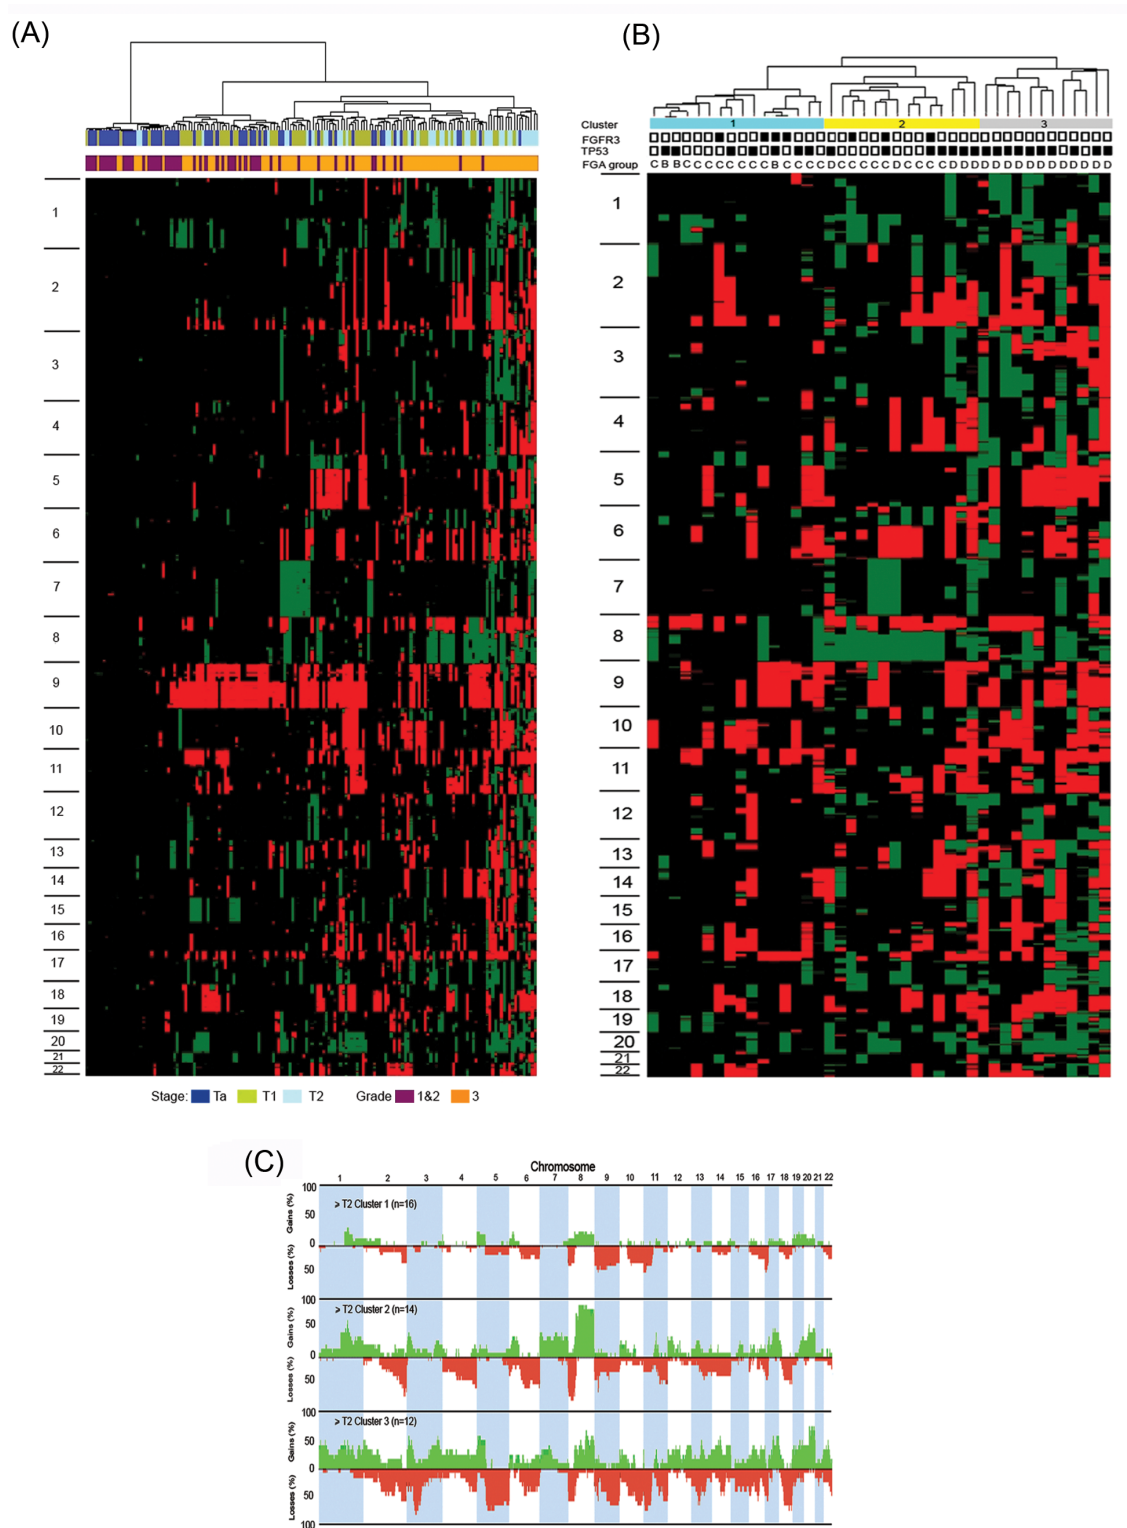

Supplement: NIHMS49834-supplement-Supplementary_Figure_5.pdf [file NIHMS49834-supplement-Supplementary_Figure_5.pdf]
