# Supplementary material
Source: PubMed Central journal article supplement (PMC5081094)
Supplement: NIHMS49834-supplement-Supplementary_Table_1.pdf [file NIHMS49834-supplement-Supplementary_Table_1.pdf]

Supplementary Table 1.

Clinico-pathological characteristics, mutation status and FGA in 160 UC.

| Sample ID | Gender | Age at onset | Stage <sup>1</sup> | Grade | Smoking | Tumor sequence | CIS     | Metastasis   | <i>FGFR3</i> status | <i>TP53</i> status <sup>2</sup> | <i>PIK3CA</i> status | <i>RAS</i> status | <i>TSC1</i> status              | <i>AKT1</i> status         | FGA (%)     | FGA group <sup>3</sup> |   |
|-----------|--------|--------------|--------------------|-------|---------|----------------|---------|--------------|---------------------|---------------------------------|----------------------|-------------------|---------------------------------|----------------------------|-------------|------------------------|---|
| 94        | M      | 84           | 1                  | 3     | Yes     | Primary        | Unknown | Yes          | p.R248C             | WT                              | WT                   | WT                | WT                              | WT                         | 12.76657061 | C                      |   |
| 95        | M      | 53           | 2                  | 3     | Yes     | Recurrence     | No      | Yes          | No                  | WT                              | WT                   | WT                | WT                              | WT                         | 14.67303982 | C                      |   |
| 113       | M      | 61           | a                  | 3     | Unknown | Recurrence     | Unknown | Unknown      | Unknown             | WT                              | WT                   | WT                | WT                              | WT                         | 13.4870317  | C                      |   |
| 137       | M      | 81           | 2                  | 3     | Yes     | Primary        | Unknown | Unknown      | Unknown             | WT                              | p.E271K              | WT                | WT                              | WT                         | 64.4956723  | D                      |   |
| 140       | F      | 84           | 1                  | 3     | Yes     | Primary        | Unknown | Unknown      | Unknown             | WT                              | WT                   | p.E542K           | WT                              | WT                         | 14.03912543 | C                      |   |
| 228       | M      | 87           | 1                  | 3     | Yes     | Recurrence     | No      | Unknown      | p.S249C             | WT                              | WT                   | WT                | WT                              | WT                         | 19.59654179 | C                      |   |
| 239       | M      | 59           | a                  | 1     | Yes     | Primary        | No      | Unknown      | Unknown             | WT                              | WT                   | WT                | WT                              | WT                         | 0           | A                      |   |
| 243       | M      | 64           | 1                  | 3     | Yes     | Primary        | Yes     | Unknown      | Unknown             | WT                              | WT                   | WT                | WT                              | p.V24fs                    | 14.61095101 | C                      |   |
| 264       | M      | 63           | a                  | 2     | Yes     | Primary        | No      | Unknown      | Unknown             | WT                              | p.E545K              | KRAS p.G12V       | WT                              | WT                         | 1.81556196  | B                      |   |
| 271       | M      | 57           | 4                  | 3     | Yes     | Primary        | Yes     | At diagnosis | Unknown             | p.K132N                         | WT                   | WT                | WT                              | WT                         | 20.45454545 | C                      |   |
| 287       | M      | 69           | a                  | 2     | Yes     | Recurrence     | Unknown | Unknown      | p.S249C             | WT                              | WT                   | WT                | WT                              | WT                         | 17.23342939 | C                      |   |
| 291       | F      | 75           | 2                  | 3     | Yes     | Primary        | Yes     | Unknown      | Unknown             | WT                              | WT                   | WT                | WT                              | WT                         | 22.85302594 | C                      |   |
| 299       | F      | 85           | a                  | 2     | No      | Recurrence     | No      | Unknown      | p.S249C             | WT                              | WT                   | WT                | WT                              | WT                         | 8.242074928 | B                      |   |
| 312       | M      | 56           | a                  | 2     | Yes     | Recurrence     | Unknown | Unknown      | p.S249C             | WT                              | WT                   | WT                | WT                              | WT                         | 10          | C                      |   |
| 315       | M      | 73           | 1                  | 3     | Yes     | Primary        | Unknown | Unknown      | Unknown             | p.R213* or p.R213W              | p.D1017H             | WT                | WT                              | WT                         | 16.858458   | C                      |   |
| 339       | M      | 70           | a                  | 2     | Yes     | Recurrence     | Unknown | Unknown      | p.Y375C             | WT                              | WT                   | WT                | p.Q55*                          | WT                         | 8.386167147 | B                      |   |
| 344       | F      | 74           | 1                  | 3     | No      | Recurrence     | Yes     | Unknown      | p.S249C             | WT                              | WT                   | WT                | WT                              | WT                         | 20.33947066 | C                      |   |
| 355       | F      | 70           | 3                  | 3     | Yes     | Recurrence     | No      | Unknown      | Unknown             | p.R280T                         | WT                   | WT                | WT                              | WT                         | 51.1527375  | D                      |   |
| 358       | F      | 73           | a                  | 2     | Yes     | Primary        | Unknown | Unknown      | Unknown             | WT                              | WT                   | WT                | WT                              | WT                         | 14.75504323 | C                      |   |
| 359       | F      | 75           | a                  | 2     | Yes     | Primary        | Unknown | Unknown      | p.S249C             | WT                              | WT                   | WT                | WT                              | p.E17K                     | 0.11527375  | A                      |   |
| 360       | M      | 69           | 2                  | 3     | Yes     | Primary        | Yes     | Unknown      | Unknown             | WT                              | WT                   | WT                | WT                              | WT                         | 26.91642651 | C                      |   |
| 364       | F      | 67           | 3                  | 3     | No      | Primary        | Yes     | Unknown      | Unknown             | p.E198*                         | p.E545K              | KRAS p.G12S       | p.S35C                          | WT                         | 25.87896254 | C                      |   |
| 366       | F      | 89           | a                  | 2     | Yes     | Primary        | Unknown | Unknown      | Unknown             | WT                              | WT                   | WT                | WT                              | WT                         | 17.03170829 | C                      |   |
| 385       | F      | 75           | 1                  | 2     | Yes     | Primary        | No      | Unknown      | p.S249C             | WT                              | WT                   | WT                | WT                              | WT                         | 7.377521614 | B                      |   |
| 397       | M      | 58           | a                  | 2     | Yes     | Recurrence     | Unknown | Unknown      | p.S249C             | WT                              | p.E542K, p.E545K     | KRAS p.G12D       | WT                              | WT                         | 0           | A                      |   |
| 406       | F      | 84           | a                  | 2     | Yes     | Primary        | No      | Unknown      | p.S249C             | WT                              | WT                   | WT                | WT                              | WT                         | 3.688760807 | B                      |   |
| 411       | M      | Unknown      | 1                  | 3     | Yes     | Recurrence     | Unknown | Unknown      | Unknown             | WT                              | WT                   | WT                | WT                              | WT                         | 71.60529344 | D                      |   |
| 417       | F      | 88           | 4                  | 3     | Yes     | Primary        | Unknown | Yes          | Unknown             | WT                              | p.E542K              | KRAS p.G12V       | WT                              | WT                         | 23.17028282 | C                      |   |
| 418       | F      | 73           | 1                  | 3     | Yes     | Primary        | Unknown | Unknown      | Unknown             | WT                              | p.E545K              | WT                | WT                              | WT                         | 7.55043227  | B                      |   |
| 433       | M      | 78           | 2                  | 3     | Yes     | Recurrence     | Unknown | Unknown      | p.S249C, p.Y375C    | WT                              | WT                   | WT                | WT                              | WT                         | 19.41887227 | C                      |   |
| 438       | F      | 73           | 2                  | 3     | Unknown | Primary        | Unknown | Unknown      | p.Y375C             | p.H214R, p.R280K                | WT                   | WT                | WT                              | WT                         | 24.29394813 | C                      |   |
| 454       | M      | 56           | a                  | 2     | Yes     | Primary        | No      | Unknown      | p.G372C             | WT                              | p.E542K              | WT                | WT                              | WT                         | 18.06916426 | A                      |   |
| 457       | M      | 67           | 1                  | 3     | Yes     | Primary        | Unknown | Unknown      | p.S249C             | p.M104G1                        | WT                   | WT                | WT                              | WT                         | 12.96829971 | C                      |   |
| 461       | M      | 53           | 1                  | 3     | Yes     | Primary        | No      | Unknown      | p.S249C             | WT                              | WT                   | WT                | WT                              | WT                         | 9.193083573 | B                      |   |
| 468       | M      | 53           | 1                  | 2     | No      | Primary        | Unknown | Unknown      | Unknown             | WT                              | WT                   | WT                | WT                              | WT                         | 5.30259366  | B                      |   |
| 482       | F      | 81           | a                  | 3     | No      | Primary        | Yes     | Unknown      | p.S249C             | WT                              | WT                   | WT                | WT                              | WT                         | 24.49567723 | C                      |   |
| 489       | F      | 67           | a                  | 3     | No      | Primary        | Yes     | Unknown      | WT                  | p.E180K                         | p.E545K              | WT                | WT                              | WT                         | 0           | A                      |   |
| 494       | F      | 68           | a                  | 2     | Yes     | Primary        | No      | Unknown      | p.S249C             | WT                              | WT                   | WT                | WT                              | WT                         | 0.3178T     | A                      |   |
| 498       | F      | 71           | 3                  | 3     | No      | Primary        | Unknown | At diagnosis | Unknown             | WT                              | WT                   | WT                | WT                              | WT                         | 16.08069144 | C                      |   |
| 500       | F      | 63           | 2                  | 3     | Yes     | Primary        | No      | Unknown      | p.S249C             | WT                              | WT                   | WT                | Splicing error (c.509-527del20) | WT                         | 12.37054085 | C                      |   |
| 504       | F      | 62           | 2                  | 3     | Yes     | Primary        | No      | Unknown      | Unknown             | WT                              | WT                   | HRAS p.G13R       | WT                              | WT                         | 31.47295742 | D                      |   |
| 511       | M      | 75           | a                  | 3     | Yes     | Primary        | No      | Unknown      | p.S249C             | WT                              | WT                   | WT                | WT                              | WT                         | 18.06916427 | C                      |   |
| 513       | M      | 63           | 2                  | 3     | Yes     | Primary        | Yes     | Unknown      | Unknown             | WT                              | p.E542K              | WT                | WT                              | WT                         | 29.68929804 | C                      |   |
| 518       | M      | 66           | a                  | 2     | No      | Primary        | No      | Unknown      | p.K652E             | WT                              | p.E542K              | WT                | WT                              | WT                         | 0           | A                      |   |
| 519       | M      | 69           | 1                  | 3     | Unknown | Primary        | Yes     | Unknown      | p.R248C             | p.E298*                         | WT                   | WT                | WT                              | WT                         | 32.53739931 | D                      |   |
| 529       | M      | 74           | a                  | 2     | Yes     | Primary        | No      | Unknown      | p.S249C             | WT                              | WT                   | WT                | WT                              | p.E17K                     | 14.52449568 | C                      |   |
| 536       | M      | 79           | a                  | 2     | No      | Primary        | Unknown | Unknown      | p.S249C             | WT                              | p.E545K              | WT                | WT                              | WT                         | 0           | A                      |   |
| 540       | M      | 64           | a                  | 2     | Yes     | Primary        | Unknown | Unknown      | p.S249C             | WT                              | WT                   | WT                | p.Y185*                         | WT                         | 15.01440922 | C                      |   |
| 554       | M      | 79           | 1                  | 2     | Yes     | Primary        | No      | Unknown      | p.S249C             | WT                              | WT                   | WT                | WT                              | WT                         | 9.250720461 | B                      |   |
| 561       | M      | 64           | 1                  | 3     | No      | Primary        | Unknown | Unknown      | Unknown             | WT                              | p.H1047R             | HRAS p.G13V       | WT                              | WT                         | 11.29682997 | C                      |   |
| 567       | M      | 75           | 1                  | 3     | Unknown | Recurrence     | Yes     | Unknown      | Unknown             | WT                              | WT                   | WT                | WT                              | WT                         | 31.00864553 | D                      |   |
| 571       | F      | 88           | 1                  | 3     | Yes     | Primary        | Unknown | Unknown      | p.S249C             | WT                              | WT                   | WT                | p.S871*                         | WT                         | 10.69164265 | C                      |   |
| 572       | M      | 61           | 1                  | 3     | Yes     | Primary        | No      | Unknown      | p.S249C             | p.R249S                         | WT                   | WT                | p.Y195*                         | WT                         | 19.0778098  | C                      |   |
| 575       | F      | 61           | a                  | 2     | Yes     | Primary        | Unknown | Unknown      | p.R248C             | WT                              | p.E545K              | WT                | WT                              | WT                         | 2.247838617 | B                      |   |
| 577       | F      | 91           | 3                  | 3     | No      | Primary        | Unknown | Unknown      | Unknown             | p.E180K                         | WT                   | WT                | WT                              | WT                         | 24.49567723 | C                      |   |
| 578       | M      | 66           | a                  | 2     | Yes     | Primary        | No      | Unknown      | p.Y375C             | WT                              | WT                   | WT                | WT                              | WT                         | 0.979827089 | B                      |   |
| 579       | F      | 74           | 1                  | 2     | No      | Primary        | No      | Unknown      | p.S249C             | WT                              | p.E545K              | WT                | p.Q55*                          | WT                         | 9.193083573 | B                      |   |
| 584       | M      | 77           | a                  | 3     | Yes     | Primary        | No      | Unknown      | p.S249C             | WT                              | WT                   | WT                | WT                              | WT                         | 0           | A                      |   |
| 588       | F      | 89           | 2                  | 3     | No      | Recurrence     | Yes     | Unknown      | Unknown             | Splicing error (c.375+5 G>A)    | WT                   | WT                | WT                              | WT                         | 43.49827388 | D                      |   |
| 589       | M      | 70           | 1                  | 3     | Yes     | Primary        | No      | Unknown      | Unknown             | WT                              | WT                   | WT                | WT                              | WT                         | 16.48414986 | C                      |   |
| 593       | M      | 75           | 1                  | 2     | Yes     | Primary        | Unknown | Unknown      | p.S249C             | WT                              | WT                   | WT                | WT                              | WT                         | 12.36311239 | C                      |   |
| 594       | M      | 74           | 2                  | 3     | Yes     | Primary        | Unknown | Unknown      | Unknown             | WT                              | WT                   | WT                | WT                              | WT                         | 63.54466859 | D                      |   |
| 595       | M      | 73           | 4                  | 3     | Yes     | Primary        | Yes     | At diagnosis | Unknown             | WT                              | p.S90fs              | WT                | WT                              | Splicing error (c.1317G>A) | WT          | 71.05868815            | D |
| 606       | M      | 66           | a                  | 3     | Yes     | Primary        | Yes     | Unknown      | p.Y375C             | WT                              | p.E545K              | WT                | WT                              | WT                         | 21.03746498 | C                      |   |
| 643       | F      | 79           | a                  | 2     | No      | Primary        | Unknown | Unknown      | p.G372C             | WT                              | p.E542K              | WT                | WT                              | WT                         | 0           | A                      |   |
| 653       | M      | 76           | 3                  | 3     | Yes     | Primary        | Yes     | Unknown      | Unknown             | p.M169*                         | WT                   | WT                | WT                              | WT                         | 34.17721519 | D                      |   |
| 657       | F      | 84           | a                  | 2     | No      | Primary        | Unknown | Unknown      | Unknown             | WT                              | p.Q643R              | WT                | WT                              | WT                         | 14.35158501 | C                      |   |
| 658       | F      | 57           | a                  | 2     | Unknown | Primary        | Unknown | Unknown      | p.S249C             | WT                              | p.E542K              | WT                | WT                              | WT                         | 0.23054755  | A                      |   |
| 672       | F      | 40           | a                  | 2     | Yes     | Primary        | Unknown | Unknown      | Unknown             | WT                              | WT                   | HRAS p.Q61R       | WT                              | WT                         | 0.172708653 | C                      |   |
| 675       | M      | 58           | a                  | 3     | Yes     | Primary        | Unknown | Unknown      | p.R248C             | WT                              | WT                   | WT                | p.S289*                         | WT                         | 7.34870317  | B                      |   |
| 677       | M      | 68           | 3                  | 3     | Yes     | Primary        | No      | Unknown      | Unknown             | p.E51*                          | WT                   | WT                | WT                              | WT                         | 11.26801153 | C                      |   |
| 695       | F      | 80           | a                  | 2     | No      | Primary        | No      | Unknown      | Unknown             | WT                              | WT                   | WT                | WT                              | WT                         | 7.665706052 | B                      |   |
| 701       | M      | 81           | 3                  | 3     | Yes     | Primary        | Yes     | Unknown      | Unknown             | p.R249S                         | WT                   | WT                | WT                              | WT                         | 4.833141542 | B                      |   |
| 718       | F      | 81           | a                  | 2     | Yes     | Primary        | Unknown | Unknown      | p.S249C             | WT                              | WT                   | WT                | WT                              | WT                         | 23.34293948 | C                      |   |
| 734       | M      | 75           | a                  | 3     | No      | Primary        | Unknown | Unknown      | Unknown             | WT                              | WT                   | WT                | WT                              | WT                         | 36.08069164 | D                      |   |
| 736       | M      | 62           | a                  | 3     | Yes     | Primary        | Unknown | Unknown      | p.Y375C             | WT                              | WT                   | HRAS p.G12S       | WT                              | WT                         | 6.300345224 | B                      |   |
| 741       | F      | 39           | 3                  | 3     | No      | Recurrence     | No      | Unknown      | Unknown             | p.R273H                         | WT                   | WT                | WT                              | WT                         | 58.50144092 | D                      |   |
| 778       | M      | 55           | 3                  | 3     | Yes     | Primary        | No      | Unknown      | p.S373C             | WT                              | WT                   | WT                | p.Q951*                         | p.E17K                     | 15.30259366 | C                      |   |
| 798       | M      | 69           | 1                  | 3     | Yes     | Primary        | Yes     | Unknown      | Unknown             | p.Y163C                         | WT                   | WT                | WT                              | p.S511fs                   | WT          | 50.31706238            | D |
| 806       | M      | 43           | 3                  | 3     | Yes     | Recurrence     | No      | Unknown      | Unknown             | WT                              | WT                   | WT                | WT                              | WT                         | 25.67723343 | C                      |   |
| 811       | F      | 73           | a                  | 2     | Yes     | Primary        | Unknown | Unknown      | p.S249C             | WT                              | WT                   | p.H1047R          | WT                              | WT                         | 0.028818444 | A                      |   |
| 818       | M      | 81           | 4                  | 3     | Yes     | Recurrence     | Unknown | At diagnosis | Unknown             | WT                              | WT                   | WT                | WT                              | WT                         | 27.80979827 | C                      |   |
| 826       | M      | 67           | 3                  | 3     | Yes     | Primary        | Yes     | Unknown      | Unknown             | WT                              | WT                   | WT                | p.L388L (somatic)               | WT                         | 14.75834292 | C                      |   |
| 837       | M      | 75           | a                  | 1     | Yes     | Primary        | Unknown | Unknown      | p.S249C             | WT                              | WT                   | WT                | WT                              | WT                         | 2.795389049 | B                      |   |

|      |   |    |   |   |         |            |         |              |                                   |                  |             |                             |        |             |   |
|------|---|----|---|---|---------|------------|---------|--------------|-----------------------------------|------------------|-------------|-----------------------------|--------|-------------|---|
| 844  | F | 72 | a | 2 | No      | Recurrence | No      | p.S240C      | WT                                | p.E542K          | WT          | WT                          | WT     | 3.948126801 | B |
| 848  | M | 87 | 2 | 3 | Yes     | Recurrence | Unknown | WT           | p.E221*                           | WT               | WT          | p.R0900*, H015Y             | WT     | 55.17836594 | D |
| 860  | M | 70 | a | 2 | Yes     | Primary    | Unknown | p.S240C      | WT                                | p.E545K          | WT          | WT                          | WT     | 4.870317003 | B |
| 866  | M | 65 | 1 | 3 | No      | Primary    | No      | p.K652N      | WT                                | WT               | WT          | WT                          | WT     | 3.832853026 | B |
| 868  | M | 79 | a | 2 | Yes     | Primary    | No      | p.S240C      | WT                                | WT               | WT          | WT                          | p.E17K | 0.115273775 | A |
| 884  | M | 82 | 1 | 3 | Unknown | Primary    | Yes     | WT           | p.R273H                           | WT               | WT          | WT                          | WT     | 24.63976045 | C |
| 893  | M | 70 | 2 | 3 | No      | Primary    | Yes     | WT           | p.C275Y                           | WT               | WT          | WT                          | WT     | 43.44073648 | D |
| 894  | F | 77 | a | 1 | No      | Primary    | Unknown | WT           | WT                                | WT               | HRAS p.Q61L | WT                          | WT     | 0.086455331 | A |
| 924  | F | 91 | a | 2 | No      | Primary    | Unknown | WT           | WT                                | WT               | WT          | WT                          | WT     | 6.195965418 | B |
| 930  | M | 80 | 1 | 3 | Yes     | Primary    | Yes     | WT           | p.K139E                           | WT               | WT          | WT                          | WT     | 68.73198847 | D |
| 933  | F | 74 | a | 2 | Yes     | Primary    | Unknown | p.S240C      | WT                                | p.E542K          | WT          | WT                          | WT     | 1.268011527 | B |
| 934  | F | 54 | a | 2 | Yes     | Primary    | Unknown | p.Y375C      | WT                                | p.E545K          | WT          | WT                          | WT     | 7.780979827 | B |
| 944  | M | 49 | 3 | 3 | Yes     | Primary    | Yes     | WT           | p.R273C                           | WT               | WT          | WT                          | WT     | 45.79976985 | D |
| 961  | M | 70 | a | 2 | Yes     | Primary    | No      | p.S373C      | WT                                | WT               | WT          | WT                          | WT     | 0.057636888 | A |
| 963  | F | 68 | a | 2 | No      | Primary    | Unknown | p.S240C      | WT                                | WT               | WT          | WT                          | WT     | 1.52737322  | B |
| 966  | M | 73 | a | 2 | No      | Primary    | No      | WT           | WT                                | WT               | WT          | p.S370*                     | WT     | 21.21037464 | C |
| 969  | M | 62 | 1 | 3 | Yes     | Recurrence | Yes     | p.Y375C      | WT                                | WT               | WT          | WT                          | WT     | 8.515535998 | B |
| 979  | M | 76 | 1 | 3 | Yes     | Primary    | Unknown | p.S240C      | WT                                | WT               | WT          | WT                          | WT     | 21.08745685 | C |
| 980  | F | 44 | a | 2 | No      | Primary    | Unknown | p.S240C      | WT                                | WT               | WT          | WT                          | WT     | 8.242074928 | B |
| 983  | M | 74 | 1 | 2 | Unknown | Primary    | Unknown | p.Y375C      | WT                                | p.H104R          | WT          | WT                          | WT     | 1.121979287 | B |
| 989  | M | 71 | a | 3 | No      | Primary    | Unknown | WT           | WT                                | WT               | WT          | WT                          | WT     | 7.796317606 | B |
| 1006 | M | 70 | a | 2 | Yes     | Primary    | No      | p.S240C      | p.G108R                           | WT               | WT          | WT                          | WT     | 7.867435159 | B |
| 1010 | M | 66 | 1 | 3 | Yes     | Primary    | Unknown | WT           | WT                                | WT               | HRAS p.R68P | WT                          | WT     | 6.530494822 | B |
| 1021 | M | 73 | 1 | 3 | Yes     | Primary    | Unknown | WT           | p.Q331*, p.D259V                  | p.E545K          | WT          | WT                          | WT     | 14.49942463 | C |
| 1025 | F | 86 | 1 | 2 | No      | Primary    | No      | WT           | WT                                | WT               | WT          | WT                          | p.E17K | 10.50057537 | C |
| 1028 | M | 65 | 1 | 3 | No      | Primary    | Unknown | WT           | WT                                | WT               | WT          | WT                          | WT     | 7.53739931  | B |
| 1033 | M | 74 | 1 | 3 | Yes     | Primary    | Unknown | WT           | p.H195T                           | WT               | WT          | p.R1906                     | WT     | 24.33831991 | C |
| 1043 | M | 79 | a | 3 | Yes     | Primary    | No      | p.S240C      | WT                                | WT               | WT          | WT                          | WT     | 31.21403913 | D |
| 1044 | M | 68 | a | 2 | Yes     | Primary    | Unknown | WT           | WT                                | WT               | WT          | WT                          | WT     | 2.968299712 | B |
| 1046 | M | 72 | a | 2 | Yes     | Primary    | Unknown | p.S240C      | WT                                | WT               | WT          | WT                          | WT     | 24.00576369 | C |
| 1049 | F | 70 | 4 | 3 | Yes     | Primary    | No      | WT           | p.Y205C                           | WT               | WT          | Splicing error (c.664-2A>G) | WT     | 42.92289988 | D |
| 1052 | F | 62 | 1 | 3 | Yes     | Recurrence | Unknown | p.Y375C      | WT                                | p.E545K          | WT          | WT                          | WT     | 12.77330265 | C |
| 1072 | M | 87 | a | 3 | Yes     | Primary    | No      | WT           | WT                                | WT               | WT          | WT                          | WT     | 20.10932106 | C |
| 1073 | M | 69 | a | 3 | No      | Primary    | Unknown | WT           | WT                                | WT               | WT          | WT                          | WT     | 23.21634062 | C |
| 1079 | F | 96 | a | 3 | No      | Primary    | Unknown | p.R248C      | WT                                | p.E545K          | WT          | p.W444*                     | WT     | 12.71576525 | C |
| 1081 | F | 79 | 1 | 3 | Yes     | Primary    | Yes     | p.A393E      | p.Y234H                           | p.H104R          | WT          | WT                          | WT     | 0           | A |
| 1082 | F | 46 | a | 3 | Yes     | Primary    | Unknown | WT           | WT                                | WT               | WT          | WT                          | WT     | 17.72151899 | C |
| 1094 | F | 67 | 1 | 3 | Yes     | Primary    | Unknown | p.S240C      | WT                                | WT               | WT          | WT                          | WT     | 13.72266974 | C |
| 1103 | M | 45 | a | 3 | No      | Primary    | Unknown | WT           | WT                                | p.E542K, p.E545K | WT          | WT                          | WT     | 0.230149597 | A |
| 1109 | M | 68 | 2 | 3 | Yes     | Primary    | Unknown | WT           | WT                                | WT               | WT          | WT                          | WT     | 21.31708644 | C |
| 1118 | M | 85 | 1 | 3 | Yes     | Primary    | Unknown | p.R248C      | WT                                | p.E545K          | WT          | KRAS p.G12D                 | WT     | 12.31300345 | C |
| 1126 | M | 85 | 3 | 3 | Yes     | Primary    | Yes     | At diagnosis | WT                                | WT               | WT          | WT                          | WT     | 42.92289988 | D |
| 1129 | M | 60 | 1 | 3 | Unknown | Primary    | Unknown | WT           | p.E68D, p.A76V, p.R337C           | WT               | WT          | NRAS p.Q61L                 | WT     | 14.47065593 | C |
| 1138 | M | 73 | 1 | 3 | Yes     | Primary    | Unknown | WT           | WT                                | WT               | WT          | WT                          | WT     | 16.7433832  | C |
| 1145 | M | 67 | 1 | 3 | Yes     | Primary    | Unknown | WT           | WT                                | WT               | WT          | WT                          | WT     | 28.73939396 | C |
| 1148 | F | 81 | 3 | 3 | Yes     | Primary    | Unknown | WT           | p.E271K, p.N3106                  | WT               | WT          | WT                          | WT     | 24.6835443  | C |
| 1153 | M | 79 | 1 | 3 | Yes     | Primary    | Unknown | p.R248C      | Splicing error (c.672-16T>T)      | WT               | WT          | WT                          | WT     | 8.745684695 | B |
| 1157 | M | 85 | 2 | 3 | Yes     | Primary    | No      | p.S240C      | WT                                | WT               | WT          | WT                          | WT     | 10.64441887 | C |
| 1161 | M | 76 | 1 | 3 | Unknown | Primary    | Unknown | p.S240C      | WT                                | p.E545K          | WT          | WT                          | WT     | 11.39240506 | C |
| 1210 | F | 68 | 1 | 3 | Yes     | Primary    | Unknown | WT           | WT                                | WT               | WT          | WT                          | WT     | 20.19562716 | C |
| 1212 | M | 48 | 1 | 3 | Yes     | Primary    | Yes     | WT           | p.T140-Q144Del, p.E224K, p.C238Y  | WT               | WT          | WT                          | WT     | 29.20020315 | C |
| 1220 | M | 59 | 1 | 2 | Yes     | Recurrence | Unknown | p.S240C      | WT                                | WT               | WT          | WT                          | WT     | 1.00690488  | B |
| 1229 | M | 90 | 1 | 3 | Yes     | Primary    | Unknown | p.S240C      | WT                                | WT               | WT          | WT                          | WT     | 15.10356732 | C |
| 1230 | M | 62 | 1 | 3 | Yes     | Primary    | No      | p.S240C      | WT                                | WT               | WT          | p.E571Q                     | WT     | 15.73647871 | C |
| 1234 | M | 78 | 1 | 3 | Yes     | Primary    | Unknown | WT           | p.M246I                           | WT               | WT          | WT                          | WT     | 24.5972382  | C |
| 1248 | F | 84 | 3 | 3 | No      | Primary    | Yes     | WT           | p.E258G                           | WT               | WT          | WT                          | WT     | 70.56962025 | D |
| 1264 | F | 65 | 1 | 3 | Yes     | Primary    | Yes     | WT           | WT                                | WT               | WT          | WT                          | WT     | 27.35903337 | C |
| 1267 | M | 73 | 2 | 3 | No      | Primary    | Yes     | p.S240C      | WT                                | p.E545K          | WT          | WT                          | WT     | 16.05293441 | C |
| 1298 | M | 75 | a | 3 | Yes     | Primary    | Unknown | p.S240C      | WT                                | p.E545K          | WT          | WT                          | WT     | 3.509781358 | B |
| 1300 | M | 53 | 1 | 3 | Yes     | Primary    | Unknown | WT           | p.L130P, p.D228H                  | p.E545K          | WT          | Splicing error (c.693G>A)   | WT     | 35.67318757 | D |
| 1301 | M | 76 | 4 | 3 | Yes     | Primary    | No      | WT           | p.R273C                           | WT               | WT          | WT                          | WT     | 38.40621404 | D |
| 1310 | M | 89 | 1 | 3 | Yes     | Primary    | Unknown | WT           | p.E258*                           | WT               | WT          | WT                          | WT     | 25.51783659 | C |
| 1311 | M | 58 | 1 | 3 | Yes     | Primary    | Unknown | p.G372C      | WT                                | p.E545Q          | WT          | p.E9fs                      | WT     | 6.214039125 | B |
| 1315 | M | 64 | 1 | 3 | Yes     | Primary    | No      | p.S240C      | p.R280T                           | p.E545K          | WT          | WT                          | WT     | 0.143843498 | A |
| 1317 | M | 47 | 3 | 3 | Yes     | Primary    | Yes     | WT           | p.K139N                           | WT               | WT          | WT                          | WT     | 2.991944764 | B |
| 1320 | M | 68 | 1 | 3 | Yes     | Primary    | Yes     | WT           | p.Y234H                           | WT               | WT          | WT                          | WT     | 50.80552359 | D |
| 1321 | F | 82 | 2 | 3 | Yes     | Primary    | Yes     | p.S240C      | p.R280K                           | p.H104R          | WT          | WT                          | WT     | 7.278481013 | B |
| 1322 | M | 59 | 4 | 3 | Yes     | Primary    | No      | WT           | WT                                | WT               | WT          | WT                          | WT     | 25.0287687  | C |
| 1324 | M | 59 | 1 | 3 | No      | Primary    | Yes     | p.S240C      | p.S90F, p.Q192*, p.G244V, p.E388Q | WT               | WT          | WT                          | WT     | 12.11162255 | C |
| 1325 | M | 42 | 1 | 3 | Yes     | Recurrence | Unknown | Yes          | p.S240C                           | p.Y234H          | WT          | WT                          | WT     | 28.30840046 | C |
| 1338 | F | 68 | 3 | 3 | Yes     | Primary    | Yes     | WT           | p.Y375C                           | p.E545K          | WT          | WT                          | WT     | 29.37284235 | C |
| 1342 | M | 68 | 1 | 2 | Yes     | Primary    | No      | WT           | p.Q192*                           | p.S240C          | WT          | WT                          | WT     | 16.11047181 | C |
| 1345 | M | 67 | 1 | 2 | Yes     | Primary    | No      | p.S240C      | WT                                | WT               | WT          | WT                          | WT     | 12.91714614 | C |
| 1349 | M | 77 | 1 | 3 | Yes     | Primary    | Yes     | WT           | WT                                | p.E545K          | WT          | KRAS p.G12V                 | WT     | 20.88607595 | C |
| 1352 | M | 78 | 2 | 2 | Yes     | Primary    | Unknown | At diagnosis | WT                                | WT               | WT          | WT                          | WT     | 36.96777906 | D |
| 1366 | M | 68 | 3 | 2 | No      | Primary    | Unknown | At diagnosis | WT                                | p.R248Q          | WT          | WT                          | WT     | 47.12313003 | D |

<sup>1</sup> If cystectomy was not performed then staging of tumours >T2 was inferred from CT scan.

<sup>2</sup> Variants c.637 C>T and c.639 A>G were both detected in sample 315

<sup>3</sup> FGA group:

A = <1.0%

B = 1.0-10%

C = 10-30%

D = >30%
