# Supplementary material
Source: PubMed Central journal article supplement (PMC5081094)
Supplement: NIHMS49834-supplement-Supplementary_Table_2.pdf [file NIHMS49834-supplement-Supplementary_Table_2.pdf]

Supplementary Table 2.

*TP53* and *FGFR3* mutation in all Ta tumors, and tumors from individual T1G3 and  $\geq$ T2 clusters.

| Tumor group | <i>FGFR3</i> mutation (%) | <i>TP53</i> mutation (%) |
|-------------|---------------------------|--------------------------|
| Ta          | 70                        | 3                        |
| $\geq$ T2   |                           |                          |
| Cluster 1   | 25                        | 44                       |
| Cluster 2   | 21                        | 50                       |
| Cluster 3   | 0                         | 83                       |
| T1G3        |                           |                          |
| Cluster 1   | 69                        | 19                       |
| Cluster 2   | 31                        | 46                       |
| Cluster 3   | 0                         | 71                       |
| Cluster 4   | 0                         | 67                       |
