# Supplementary material
Source: PubMed Central journal article supplement (PMC5081094)
Supplement: NIHMS49834-supplement-Supplementary_Table_3.pdf [file NIHMS49834-supplement-Supplementary_Table_3.pdf]

**Supplementary Table 3.**

**Relationship between copy number gains and losses and individual Ta, T1G3 and  $\geq$ T2 clusters.** For each tumor group (Ta, T1G3,  $\geq$ T2), the average numbers of clones reporting gain or loss, and the numbers of gain and loss events were determined for all tumors within individual clusters. Standard deviation is also shown.

| <b>Ta tumors</b>                           |      | <b>Cluster 1</b> | <b>Cluster 2a</b> | <b>Cluster 2b</b> | <b>Cluster 3</b> |
|--------------------------------------------|------|------------------|-------------------|-------------------|------------------|
| <b>Average number of clones reporting:</b> |      |                  |                   |                   |                  |
|                                            | Loss | 8.90±16.23       | 258.09±169.33     | 134.17±71.92      | 403±152.46       |
|                                            | Gain | 3.14±6.24        | 94.82±117.59      | 93.58±82.72       | 324.78±191.12    |
| <b>Average number of events:</b>           |      |                  |                   |                   |                  |
|                                            | Loss | 1±1.64           | 11.73±9.11        | 4.17±2.08         | 15.64±7.98       |
|                                            | Gain | 0.91±1.37        | 4.82±5.79         | 4.25±3.81         | 11.86±8.42       |

  

| <b>T1G3 tumors</b>                         |      | <b>Cluster 1</b> | <b>Cluster 2</b> | <b>Cluster 3</b> |
|--------------------------------------------|------|------------------|------------------|------------------|
| <b>Average number of clones reporting:</b> |      |                  |                  |                  |
|                                            | Loss | 239.81±133.09    | 692.31±211.85    | 394.57±241.12    |
|                                            | Gain | 165±146.04       | 178.23±119.10    | 473±267.36       |
| <b>Average number of events:</b>           |      |                  |                  |                  |
|                                            | Loss | 7.54±5.23        | 13.84±4.47       | 13.42±5.32       |
|                                            | Gain | 4.27±3.72        | 7.15±7.15        | 20.43±9.11       |

  

| <b>T2 tumors</b>                           |      | <b>Cluster 1</b> | <b>Cluster 2</b> | <b>Cluster 3</b> |
|--------------------------------------------|------|------------------|------------------|------------------|
| <b>Average number of clones reporting:</b> |      |                  |                  |                  |
|                                            | Loss | 387.87±228.87    | 571.34±330.86    | 959.66±295.51    |
|                                            | Gain | 150.19±79.68     | 559.21±211.18    | 805.5±280.57     |
| <b>Average number of events:</b>           |      |                  |                  |                  |
|                                            | Loss | 10.75±8.94       | 15.86±11.66      | 25.33±10.72      |
|                                            | Gain | 7.25±4.64        | 24.36±18.24      | 38.33±19.70      |
