# Supplementary material
Source: PubMed Central journal article supplement (PMC5081094)

# Supplementary Figure 1.

## Fraction of genome altered (FGA%).

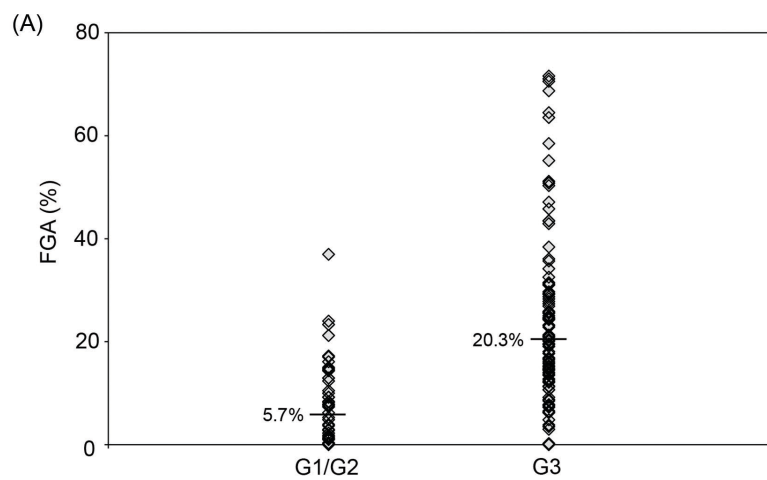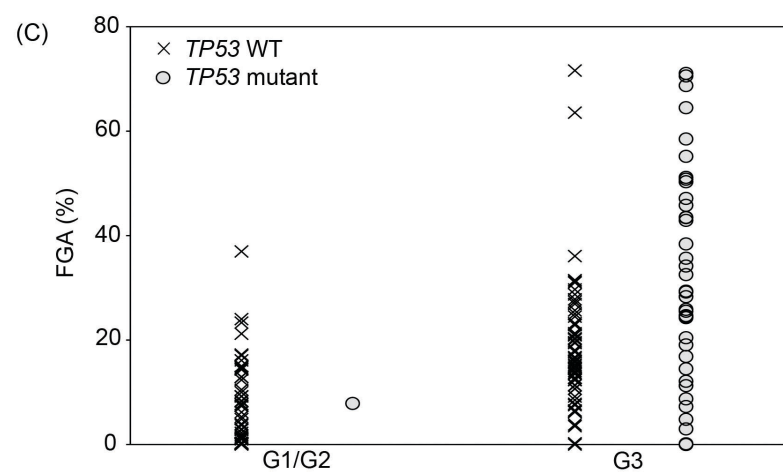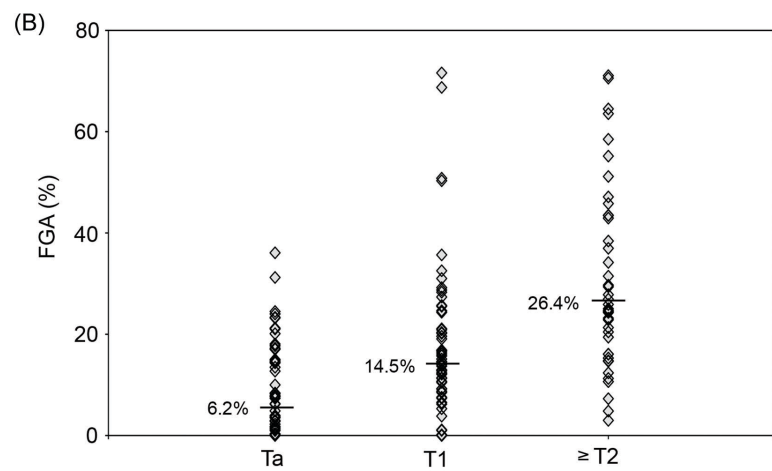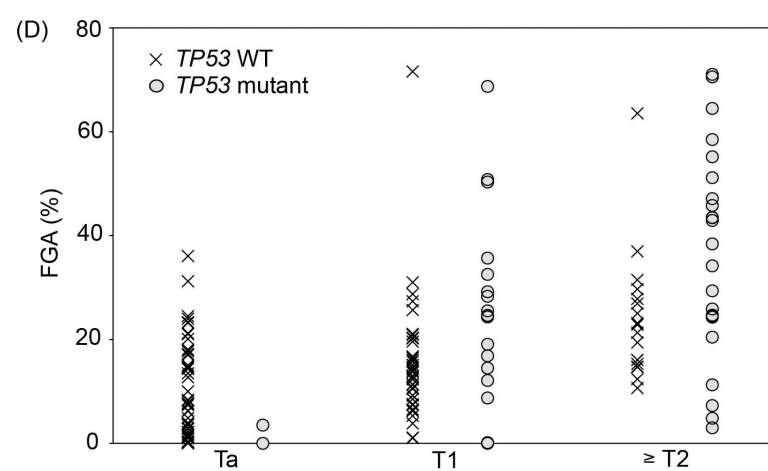

Supplement: NIHMS49834-supplement-Supplementary_Figure_1.pdf [file NIHMS49834-supplement-Supplementary_Figure_1.pdf]

## Supplementary Figure 2.

### 8q22.2-q22.3 amplification in UC.

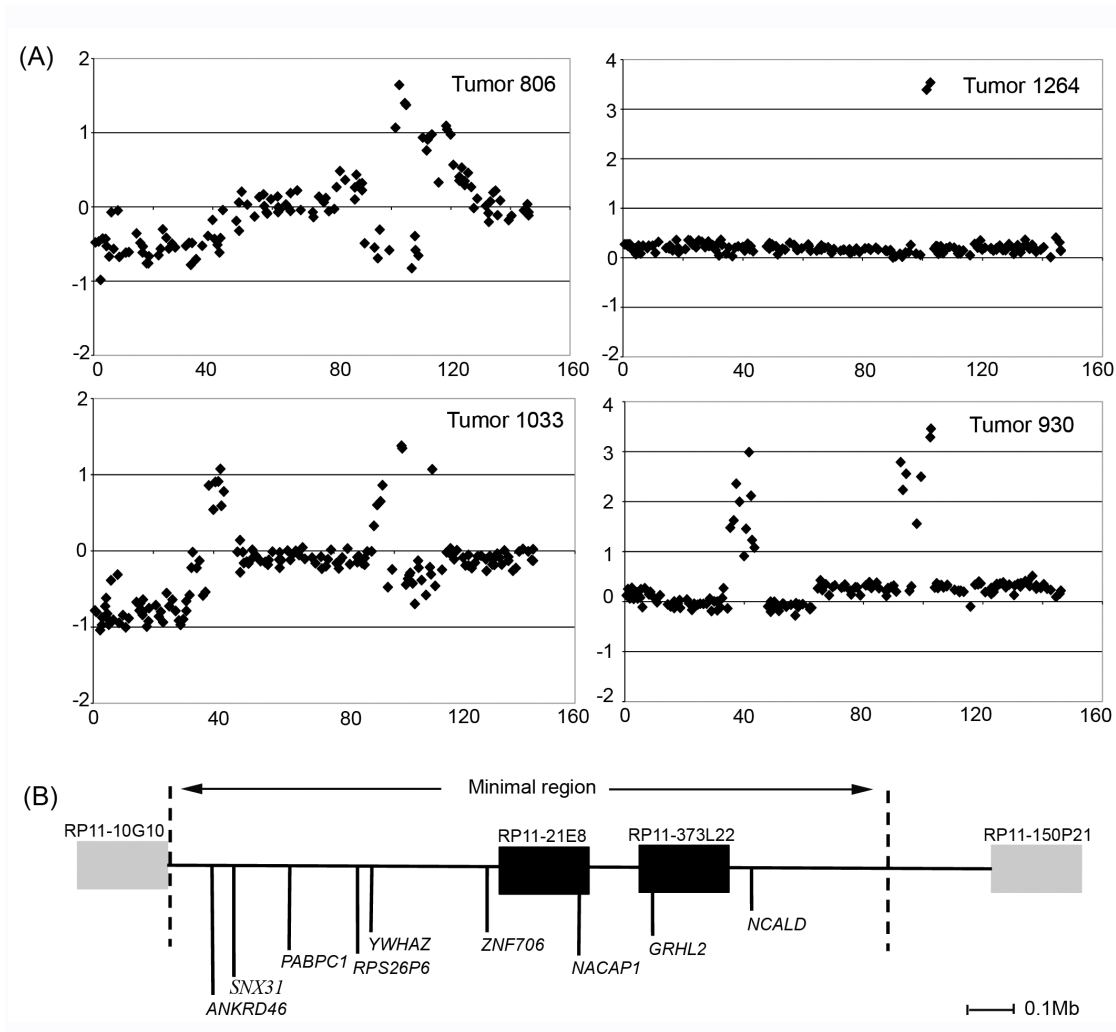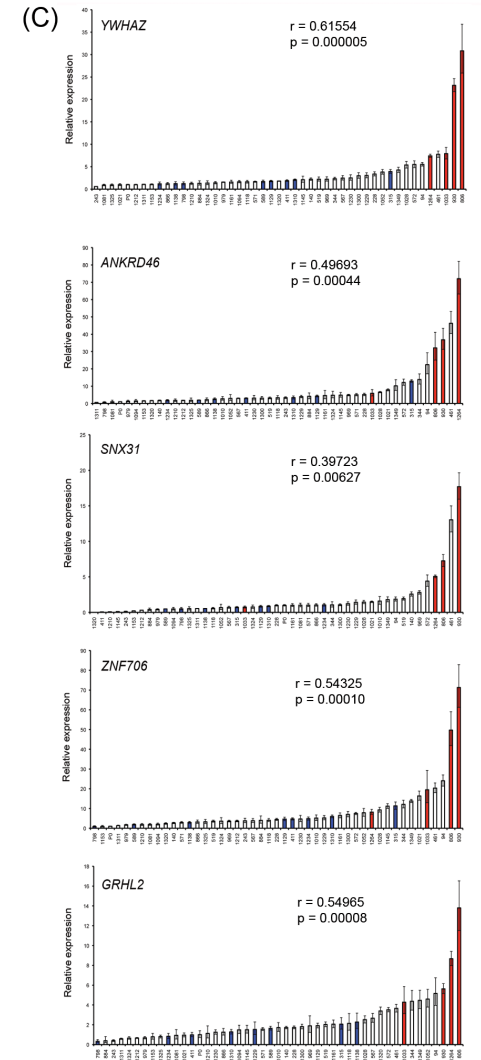

Supplement: NIHMS49834-supplement-Supplementary_Figure_2.pdf [file NIHMS49834-supplement-Supplementary_Figure_2.pdf]

# Supplementary Figure 6.

## Loss and gain in tumors from individual Ta, T1 and $\geq$ T2 clusters.

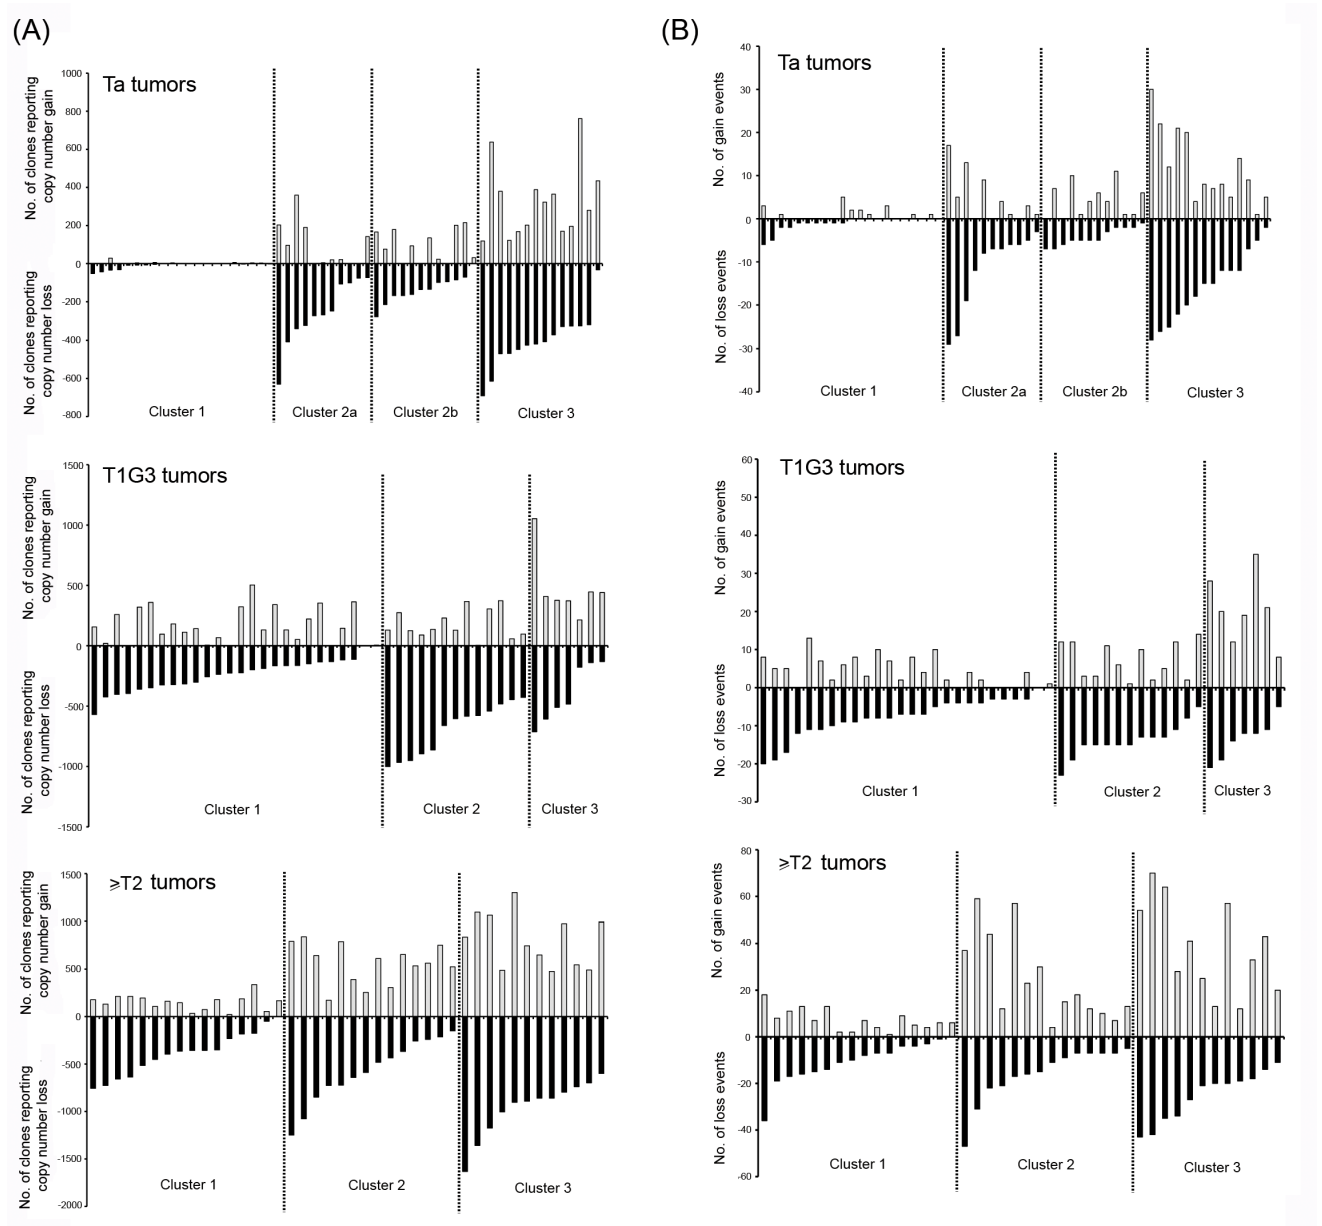

Supplement: NIHMS49834-supplement-Supplementary_Figure_6.pdf [file NIHMS49834-supplement-Supplementary_Figure_6.pdf]
